# Supplementary material for: Altered secretory and neuroprotective function of the choroid plexus in progressive multiple sclerosis
Source: PubMed Central journal article supplement (PMC7083003; doi:10.1186/s40478-020-00903-y), 2020-03-19

a

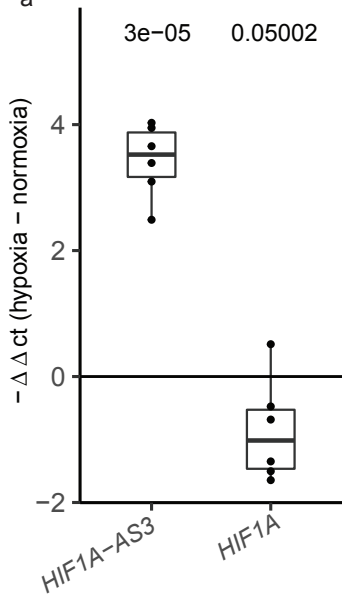

Supplement: 40478_2020_903_MOESM2_ESM.pdf [file 40478_2020_903_MOESM2_ESM.pdf]
