# Supplementary material for: Altered secretory and neuroprotective function of the choroid plexus in progressive multiple sclerosis
Source: Acta Neuropathol Commun. 2020 Mar 19;8:35. doi: 10.1186/s40478-020-00903-y (PMC7083003; doi:10.1186/s40478-020-00903-y)
Supplement: Supplementary file 5 — Additional file 5: Supplementary Table 1. Details of the human choroid plexus samples used for RNA-seq. F: female, M: male; PMD: Post-mortem delay; RIN: RNA integrity number; SP: Secondary Progressive; PP: Primary Progressive. The type of MS is noted in between brackets, as extracted from the clinical report, sometimes unclear [file 40478_2020_903_MOESM5_ESM.xlsx]

## Sheet: Sheet1
Sample	Control / MS	Sex	Age	PMD (h)	Cause of death	Comorbidities	RIN
Control 1	Control	F	68	5.75	Euthanasia	Vaginal carcinoma, kidney tumor and lung metastasis.	8
Control 2	Control	M	55	7.5	Euthanasia	Metastatic esophageal cancer, ileus	7.4
Control 3	Control	F	64	5.67	n/a	Pneumothorax.	8.3
Control 4	Control	F	57	7.67	Euthanasia	Metastatic urothelial cancer, pleuritis carcinomatosa	7.4
Control 5	Control	F	70	7.58	Cachexia by endstage pancreas carcinoma	Icterus, cholangitis, fever	8.4
Control 6	Control	M	59	8	Euthanasia	Hypertension, adrenal gland carcinoma	7.1
MS 1	(SP) MS	M	53	5.5	Respiratory insufficiency	Pneumonia, lung edema, ascites, anuria	8.1
MS 2	(PP) MS	F	44	10.25	Decompensation	Sepsis	7.2
MS 3	(PP) MS	M	67	11	Sudden death with MS	Aspiration pneumonia.	6.8
MS 4	(PP) MS	M	63	7.08	Cardiac arrest after rupture of abdominal aorta aneurysm	n/a	8.9
MS 5	(SP) MS	M	63	8.25	Pneumonia, cachexia and dehydration	Hyperesthesia / hyperalgesia	7.5
MS 6	(PP?) MS	F	76	7.5	Pyelonephritis with palliative care	Delirium	7.7
