# Supplementary material for: Altered secretory and neuroprotective function of the choroid plexus in progressive multiple sclerosis
Source: Acta Neuropathol Commun. 2020 Mar 19;8:35. doi: 10.1186/s40478-020-00903-y (PMC7083003; doi:10.1186/s40478-020-00903-y)
Supplement: Supplementary file 6 — Additional file 6: Supplementary Table 2. Details of the human choroid plexus samples used for explants culture. F: female, M: male; PMD: Post-mortem delay. [file 40478_2020_903_MOESM6_ESM.xlsx]

## Sheet: Sheet1
Sample	Diagnosis	Gender	Age	pH CSF	PMD (h)	Brain weight (g)
1	MS	M	75	6.24	9.17	1140
2	Control	F	82	na	6.33	1295
3	MS	F	81	6.06	9.95	1148
4	Control	M	87	6.47	6.35	1295
5	Alzheimer's disease	M	77	6.63	4.43	1564
6	MS	F	53	6.76	5.83	1385
