# Supplementary material for: Altered secretory and neuroprotective function of the choroid plexus in progressive multiple sclerosis
Source: Acta Neuropathol Commun. 2020 Mar 19;8:35. doi: 10.1186/s40478-020-00903-y (PMC7083003; doi:10.1186/s40478-020-00903-y)
Supplement: Supplementary file 7 — Additional file 7: Supplementary Table 3. Details of the human CSF samples used. Patient information is provided, together with an indication of the experiment(s) for which the samples were used. NINDC: non-inflammatory disease controls; SC: symptomatic controls; INDC: inflammatory CNS disease. [file 40478_2020_903_MOESM7_ESM.xlsx]

## Sheet: table-sup2-csf_cohort
Type	Gender	Age	Diagnosis	EDSS	ADM	PAI-1	STC2
Control	m	33	HC	na	x	x
Control	m	28	HC	na	x	x
Control	f	26	HC	na	x	x
Control	m	32	HC	na	x	x
Control	f	30	HC	na	x	x
Control	f	73	NINDC, Labyrinth dysfunction	na	x	x	x
Control	f	56	SC, Paresthesia	na	x	x	x
Control	m	53	SC, Paresthesia	na		x	x
Control	m	53	NINDC, Hypersomnia	na	x	x	x
Control	m	50	INDC, Polyneuropathy	na	x
Control	m	47	SC, Paresthesia	na	x	x	x
Control	f	42	INDC, Balance disturbance	na	x		x
Control	m	42	SC, paresthesia	na	x	x	x
Control	f	36	SC, Paresthesia	na	x	x	x
Control	f	32	SC, Paresthesia	na	x		x
Control	f	29	NINDC, Observation for CNS disease	na	x
Control	m	35	SC, Anxiety	na	x		x
Control	f	32	SC, Paresthesia	na		x	x
Control	m	42	SC, paresthesia	na	x	x	x
Control	m	29	SC, paresthesia	na	x		x
Control	f	25	INDC, Epilepsy	na	x		x
Control	m	24	NINDC, Fatigue	na	x		x
Control	f	24	NINDC, Headache	na	x		x
Control	m	20	NINDC, Observation for CNS disease	na	x
Control	f	41	INDC, Sjögrens syndrome	na	x
Control	f	47	INDC, SLE	na	x
Control	f	37	INDC, Trigeminal Neuralgia	na	x		x
Control	m	34	NINDC, Migraine	na	x		x
Control	F	25	OND	na			x
Control	M	29	OND	na			x
RRMS-relapse	f	24		1.5	x
RRMS-relapse	m	41		1.5	x
RRMS-relapse	m	44		2	x
RRMS-relapse	m	51		2.5	x
RRMS-remission	f	39		4	x
RRMS-remission	m	47		2.5	x
RRMS-remission	m	25		1	x
RRMS-remission	f	41		1	x
PPMS	m	43		5.5	x	x	x
PPMS	f	59		6.5	x	x	x
PPMS	m	51		6	x	x	x
PPMS	f	54		3.5	x	x	x
PPMS	m	58		6	x	x	x
PPMS	m	61		4	x	x	x
PPMS	f	66		5	x	x	x
PPMS	f	63		3.5	x	x	x
SPMS	f	51		5	x	x	x
SPMS	f	51		7	x	x	x
SPMS	f	52		5	x	x	x
SPMS	m	40		8	x	x	x
SPMS	f	57		5.5	x	x
SPMS	m	59		4	x	x	x
SPMS	m	61		4	x	x	x
SPMS	m	66		6	x	x	x
PRMS	f	45		1.5	x
PRMS	f	29		1	x
PRMS	f	46		5	x
SPMS	f	63		na		x	x
