# Supplementary material for: Altered secretory and neuroprotective function of the choroid plexus in progressive multiple sclerosis
Source: Acta Neuropathol Commun. 2020 Mar 19;8:35. doi: 10.1186/s40478-020-00903-y (PMC7083003; doi:10.1186/s40478-020-00903-y)
Supplement: Supplementary file 11 — Additional file 11: Supplementary Table 7. Results from the gene expression analysis in CP explants in normoxia and hypoxia. Table displays the p-values of the difference in expression between the CP explants in normoxia or hypoxia, assessed by paired two-tailed Welch t-test [file 40478_2020_903_MOESM11_ESM.xlsx]

## Sheet: Sheet1
gene	p
18srrna	NA
adm	0.003
lyve1	0.154
mt1x	0.003
rnd3	0.523
serpine1	0.013
eif4a1	0.07074
hif1aas3	3e-05
hk2	0.0001
ier2	0.17208
ldhap4	0.03821
myc	0.34204
cxcl2	0.72259
hif1a	0.05002
mt1a	0.17734
snhg15	0.02307
stc2	0.00112
tshz3	0.02871
